# Supplementary material for: Hypomania and saccadic changes in Parkinson’s disease: influence of D2 and D3 dopaminergic signalling
Source: PubMed Central journal article supplement (PMC6969176; doi:10.1038/s41531-019-0107-3), 2020-01-17

# Supplementary

## Supplementary Table 1:

### Refractory abnormalities the parkinsonian patients

| No° | Diopter |       | Correction (dpt) |      | Eye disease                                | Add. information                                |
|-----|---------|-------|------------------|------|--------------------------------------------|-------------------------------------------------|
|     | right   | left  | right            | left |                                            |                                                 |
| 1   | 0       | +0,5  | -                | -    | Cataract                                   |                                                 |
| 2   | 0       | 0     | -                | -    | age farsightedness                         | just reading glasses                            |
| 3   | +2,25   | +2,25 | +2,0             | +2,0 | -                                          |                                                 |
| 4   | +1,0    | +1,5  | +1,0             | +1,0 | -                                          |                                                 |
| 5   | +1,5    | +1,5  | +1,0             | +1,0 | -                                          |                                                 |
| 6   | +1,5    | +1,5  | +1,0             | +1,0 | -                                          |                                                 |
| 7   | -1,5    | -1,25 | -1,0             | -1,0 | Cataract                                   |                                                 |
| 8   | 0       | +1,0  | -                | -    | Disc drusen                                | no lenses tolerated                             |
| 9   | +0,25   | +0,75 | -                | -    | Cataract                                   |                                                 |
| 10  | -1,0    | +0,25 | -1,0             | -    | Cataract                                   |                                                 |
| 11  | -0,5    | +1,5  | -                | +1,0 | Cataract                                   |                                                 |
| 12  | +0,5    | +1,0  | -                | -    | -                                          | no lenses tolerated                             |
| 13  | +2,5    | +2,5  | +2,0             | +2,0 | -                                          |                                                 |
| 14  | +1,5    | +0,5  | +1,0             | -    | -                                          |                                                 |
| 15  | +4,0    | +4,0  | +4,0             | +4,0 | -                                          |                                                 |
| 16  | -1,75   | -2,0  | -2,0             | -2,0 | -                                          |                                                 |
| 17  | -1,75   | -1,75 | -2,0             | -2,0 | after eyelid op                            |                                                 |
| 18  | +1,75   | -1,25 | +2,0             | -1,0 | -                                          |                                                 |
| 19  | -0,5    | -0,25 | -                | -    | Cataract                                   |                                                 |
| 20  | -7,0    | -6,5  | -6,0             | -6,0 | -                                          |                                                 |
| 21  | -1,0    | -2,75 | -                | -3,0 | Cataract                                   | no lense on the right eye tolerated<br>dry eyes |
| 22  | +1,5    | +1,25 | +1,0             | +1,0 | -                                          |                                                 |
| 23  | +2,75   | +2,75 | +3,0             | +3,0 | -                                          |                                                 |
| 24  | +0,5    | +0,5  | -                | -    | -                                          |                                                 |
| 25  | 0       | 0     | -                | -    | Cataract, age farsightedness               | just reading glasses                            |
| 26  | 0       | 0     | -                | -    | Cataract, age farsightedness               | just reading glasses                            |
| 27  | -0,25   | 0     | -                | -    | Cataract                                   | -                                               |
| 28  | +1,5    | +1,5  | +1,0             | +1,0 | -                                          |                                                 |
| 29  | -1,75   | -1,75 | -2,0             | -2,0 | -                                          |                                                 |
| 30  | 0       | 0     | -                | -    | age farsightedness                         | just reading glasses                            |
| 31  | 0       | 0     | -                | -    | trauma of the left eye, age farsightedness | just reading glasses                            |
| 32  | 0       | 0     | -                | -    | age farsightedness                         | just reading glasses                            |
| 33  | 0       | 0     | -                | -    | age farsightedness                         | just reading glasses                            |

## Supplementary Figure 1:

Tractography of the nigro-caudatal and nigro-collicular tract on the left side

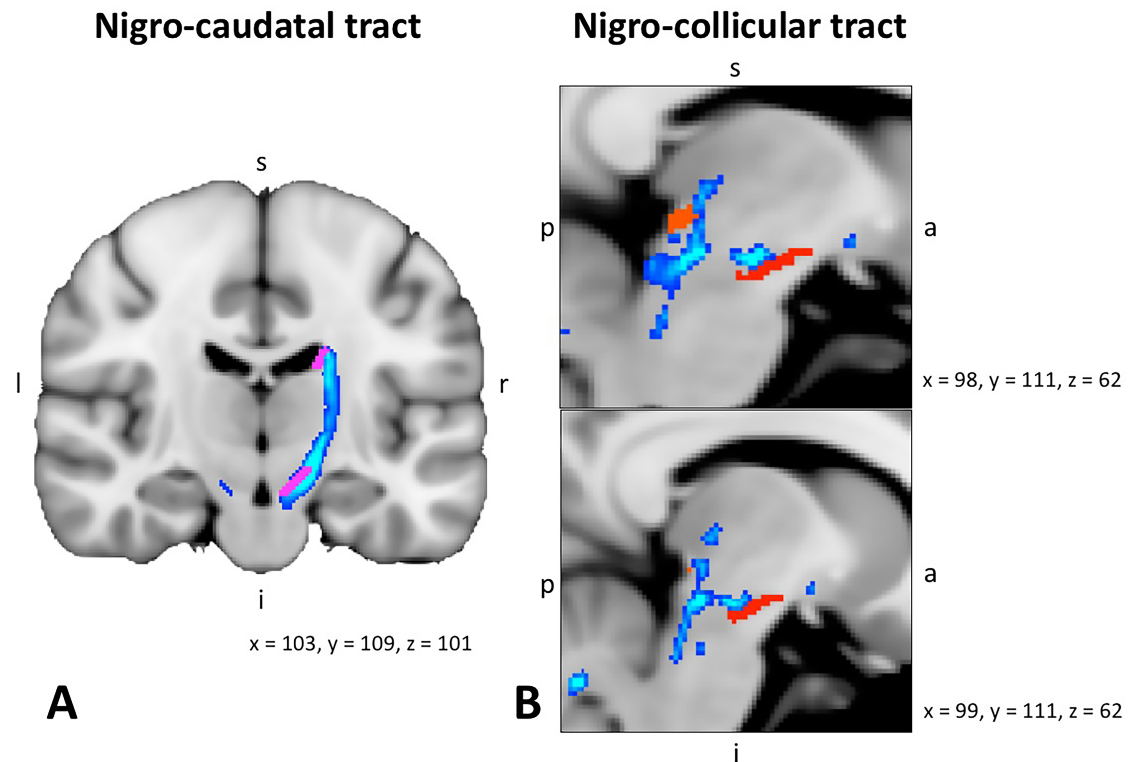

**A** Coronal view of projections from the SN to the CD at x = 103; y = 109 and z = 101.

*Pink= Masks of SN (inferior) and CD (superior); blue-lightblue= projections between these two structures.*

**B** Sagittal view projections from the SC (posterior-superior) to the SN (anterior-inferior) at level x = 98 - 99; y = 111; z = 62.

*Red= Mask of SN (anterior-inferior) and SC (posterior-superior); blue-lightblue= projections between these two structures.*

## Supplementary Figure 2:

Linear regression analysis of the HPS in the whole parkinsonian group

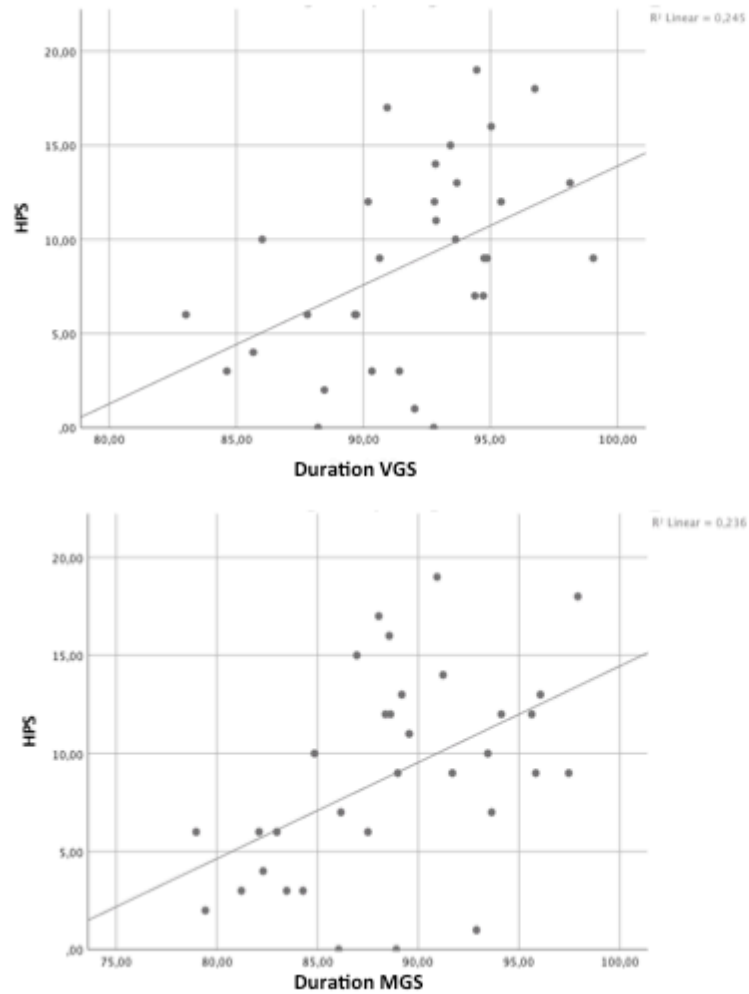

Both, the visually (top) and memory-guided (bottom) saccades are associated with the scores in the HPS reliably.

### Supplementary Figure 3:

Linear regression analysis of the HPS in the DRD3- group

**DRD3-**

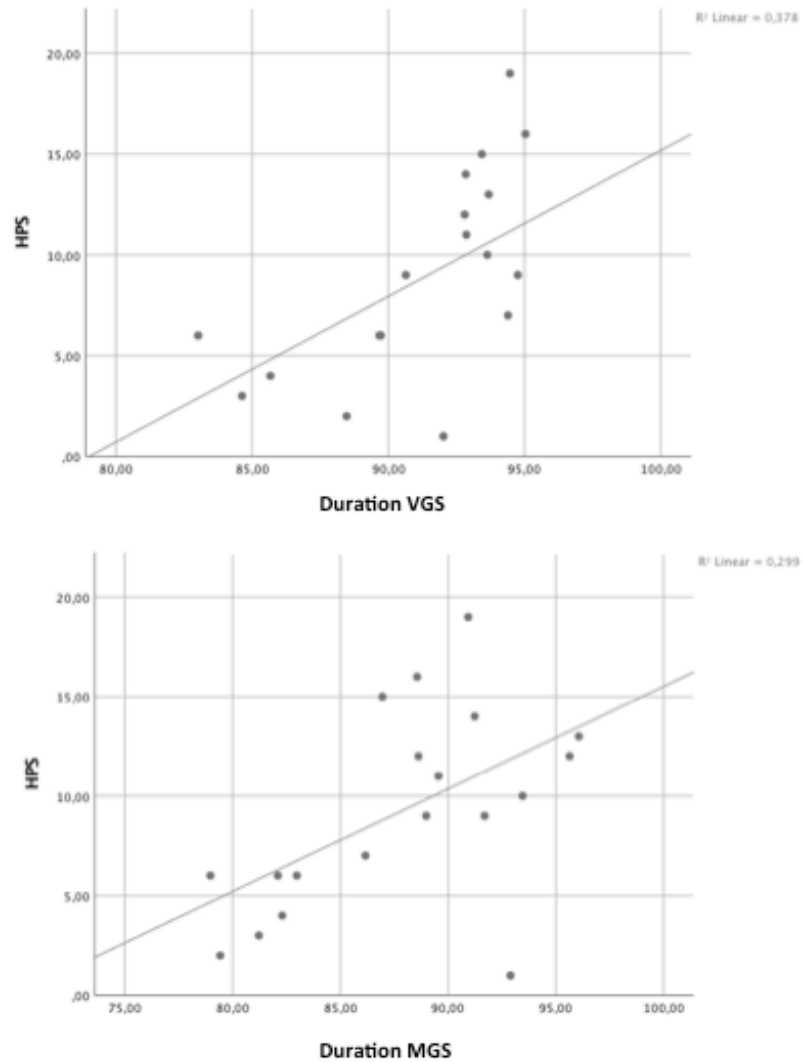

Both, the visually (top) and memory-guided (bottom) saccades are associated with the scores in the HPS reliably.

## Supplementary Figure 4:

Linear regression analysis of the HPS in the DRD2- group

DRD2-

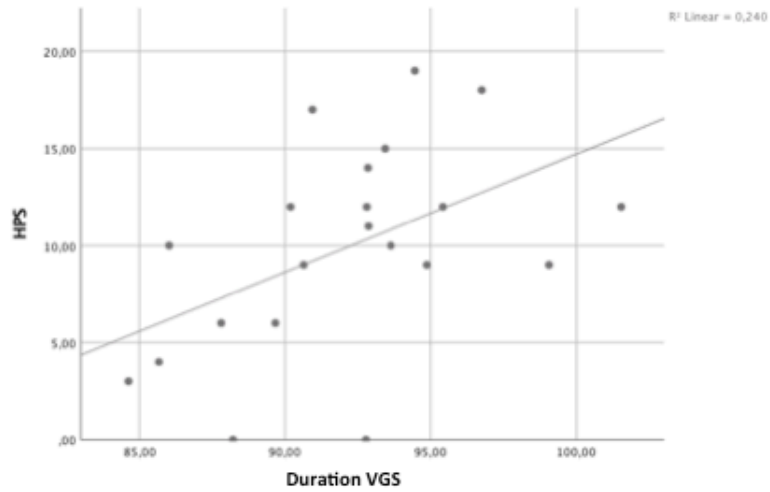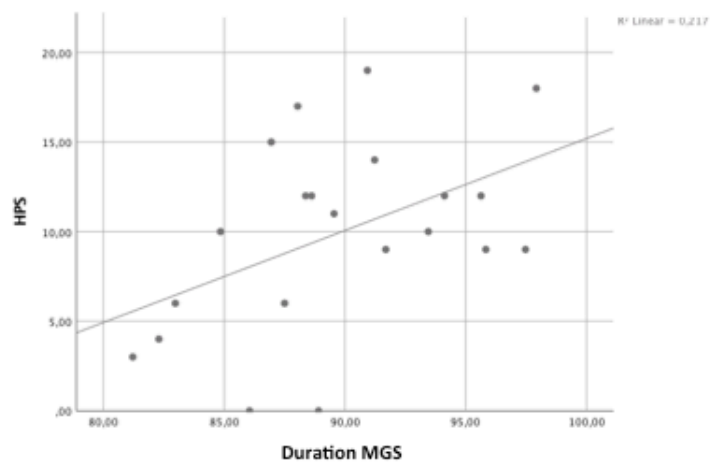

Both, the visually (top) and memory-guided (bottom) saccades are associated with the scores in the HPS reliably.

## Supplementary Figure 5:

### a) Preprocessing of structural data

(see <https://github.sf.mpg.de/TNC/kfo2-parkinson.git>;

Makefile.koeln-probands.struct2\_fs)

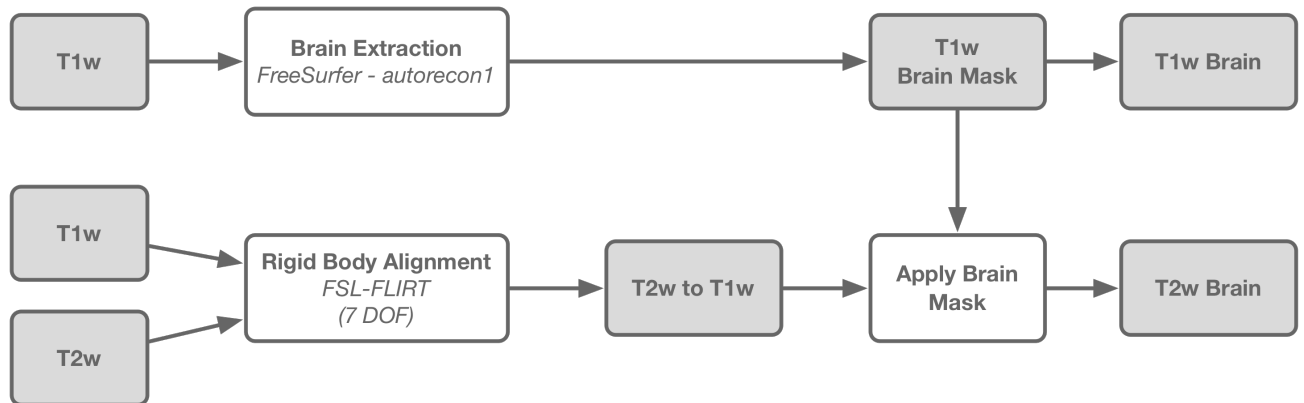

### b) Preprocessing of diffusion weighted data

(see <https://github.sf.mpg.de/TNC/kfo2-parkinson.git>;

Makefile.koeln\_prisma.dwi)

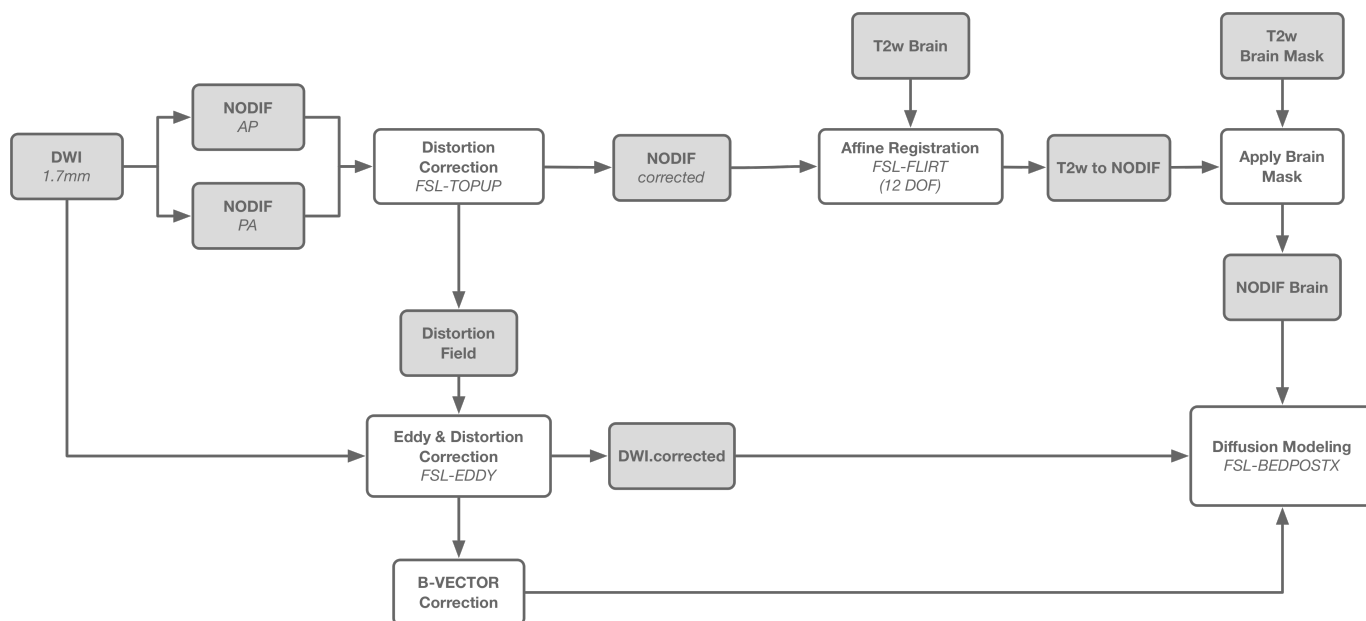

**c) Registration of structural datasets to diffusion weighted data**  
 (see <https://github.sf.mpg.de/TNC/kfo2-parkinson.git>;  
 Preproc\_Eyepark)

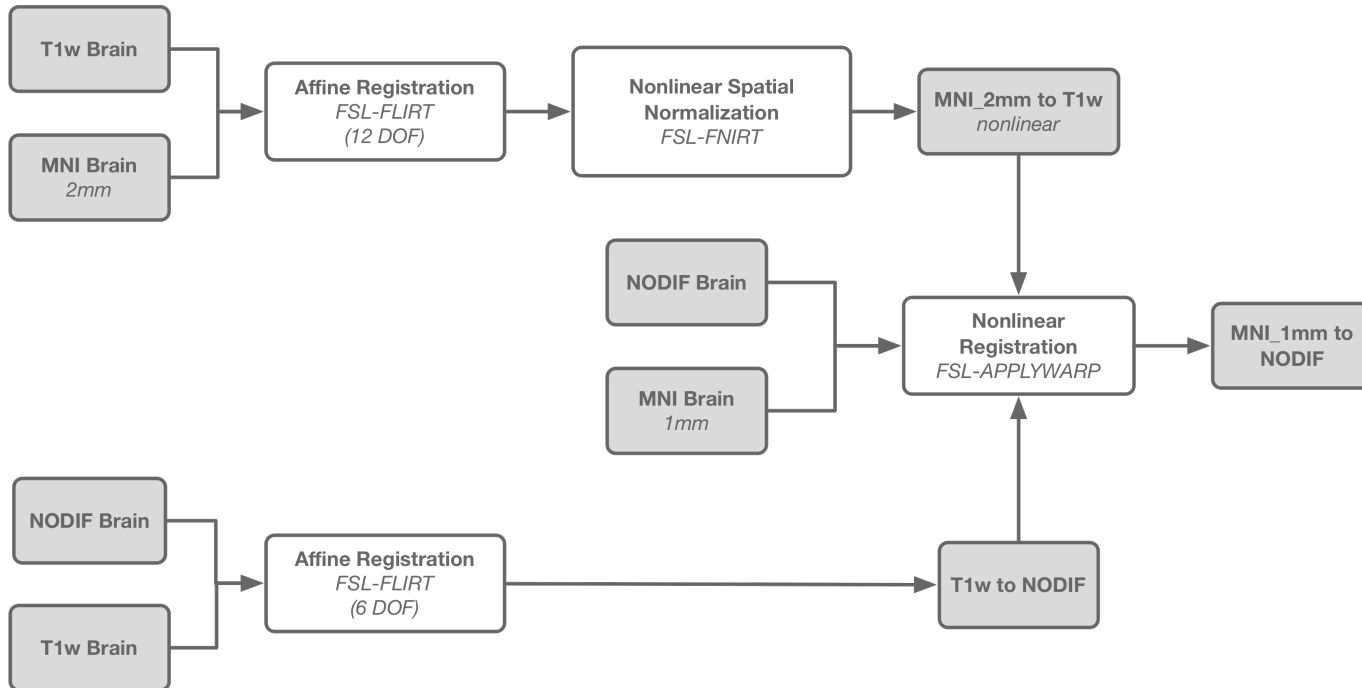

**d) Processing steps to run diffusion tractography**  
 (see <https://github.sf.mpg.de/TNC/kfo2-parkinson.git>;  
 EYE\_ANAT\_TRAKTOGRAPHY)

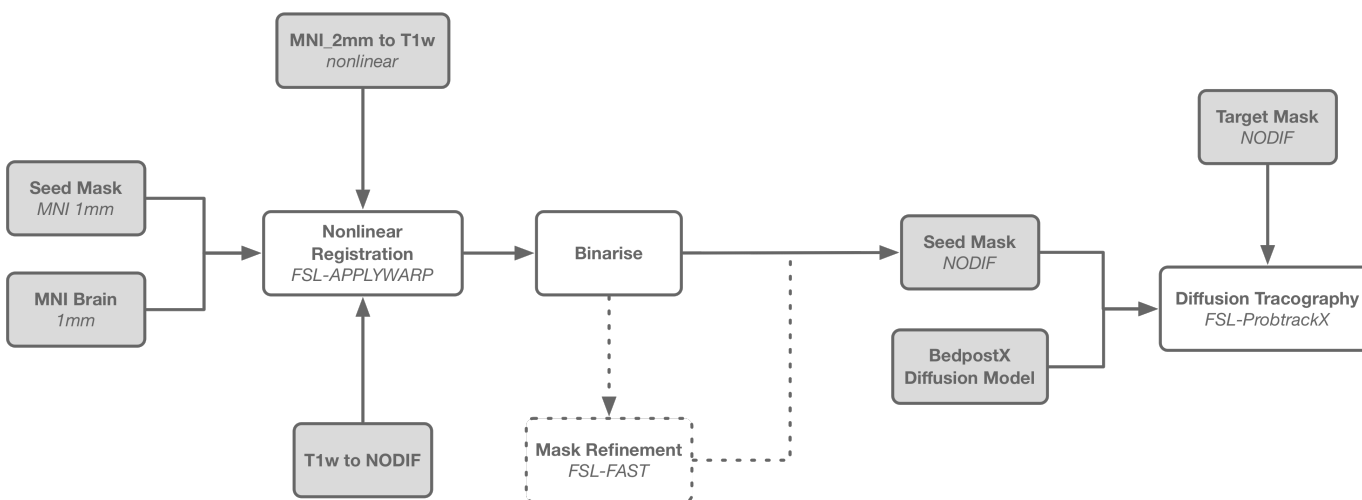

Supplement: 41531_2019_107_MOESM1_ESM.pdf [file 41531_2019_107_MOESM1_ESM.pdf]
